# Supplementary material for: Modulating built-in electric field via Br induced partial phase transition for robust alkaline freshwater and seawater electrolysis
Source: Royal Society of Chemistry journal article supplement (doi:10.1039/d4sc06673a), 2024-11-27
Supplement: d4sc06673a1.pdf [file d4sc06673a1.pdf]

**Supporting Information for**

**Modulation of Built-in Electric Field via Br Induced Partial Phase  
Transition for Robust Alkaline Freshwater and Seawater Electrolysis**

Lei Jin, Hui Xu\*, Kun Wang, Yang Liu, Xingyue Qian, Haiqun Chen\*, Guangyu He\*

*Key Laboratory of Advanced Catalytic Materials and Technology, Advanced*

*Catalysis and Green Manufacturing Collaborative Innovation Center, Changzhou*

*University, Changzhou, Jiangsu Province 213164, China*

*Corresponding authors: xuhui006@cczu.edu.cn (H. Xu); hegy@cczu.edu.cn (G. He);*

*chenhq@cczu.edu.cn (H. Chen)*

## 1. Material characterizations

The crystal phases and structures of the as-prepared samples were characterized by powder X-ray diffraction (XRD) with Bruker D8 Advance diffractometer (Cu K $\alpha$  radiation,  $\lambda = 0.15418$  nm) in the  $2\theta$  range of  $20$ - $80^\circ$  at a scanning rate of  $0.05^\circ$  s $^{-1}$ . The microstructures of the products were observed by transmission electron microscopy (TEM, JEM-2100F) and field-emission scanning electron microscopy (FESEM, Zeiss Supra 55) that equipped with element mappings. The morphologies of the materials were characterized by scanning electron microscopy (SEM, Zeiss Sigma 300 Cold Field scanning electron microscope). X-ray photoelectron spectroscopy (XPS, PHI-5000C ESCA, PerkinElmer, USA) was employed to obtain elemental information of prepared catalysts on a VG ESCALAB MKII using Al K $\alpha$  radiation. The Fourier transform infrared spectrometer (FT-IR, Nicolet iS5) was recorded to detect the functional groups of samples in the range of  $200$ - $2000$  cm $^{-1}$ . Ultraviolet photoelectron spectroscopy (UPS) is performed on Thermo ESCALAB Xi+ equipped with ultraviolet photoelectron spectrometer (HeI ( $21.22$  eV)). Electron paramagnetic resonance (EPR) spectra were recorded on a Bruker EPR ELEXSYS 500 spectrometer. Inductively coupled plasma optical emission spectroscopy (ICP-OES) characterization was performed on an Agilent Varian 720ES equipment. Absorbance data of spectrophotometer were measured on UV-2700 spectrophotometer. Analysis of the molecular structure of the catalyst was performed using a Raman spectrometer (XPOLORA PLUS, China) at an excitation wavelength of  $532$  nm for Raman scattering peak analysis.

## 2. Electrochemical measurements

All the electrochemical measurements were tested using a CHI760E electrochemical workstation with a standard three electrode cell. The reference and counter electrodes were Hg/HgO and graphite rod, respectively. A glassy carbon electrode (GCE, 5 mm inner diameter) that modified with catalyst ink is used as the working electrode. The homogeneous catalyst ink was made by ultrasonically dispersing a mixture containing 2 mg of catalyst, 20  $\mu$ L Nafion (5 wt%), 360  $\mu$ L ethanol and 120  $\mu$ L ultrapure water. Then, 13  $\mu$ L of the catalyst ink was dropped on the surface of GCE. All potentials were measured against Hg/HgO and converted to reversible hydrogen electrode (RHE) by Nernst equation:  $E_{vs\ RHE} = E_{vs\ Hg/HgO} + 0.0591 \cdot pH + 0.098$ . The overpotential ( $\eta$ ) was calculated through the formula:  $\eta = E_{RHE} - 1.23\ V$ . Cyclic Voltammograms (CV) were measured at a scan rate of 5 mV/s. Electrochemical impedance spectroscopy was tested over the frequency range of 1000000 to 0.01 Hz with an AC signal amplitude of 5 mV. The double-layer capacitance ( $C_{dl}$ ) was evaluated by cyclic voltammetry (CV) curves performed at the non-faraday reaction regions with an interval of 20 mV/s over the scanning range of 20 ~ 120 mV/s. The turnover frequency (TOF) values were calculated from the following equation:  $TOF = (j \times A) / (k \times F \times n)$ . Here,  $k$  is the number of electron transfer (the factors of HER and OER are respectively 2 and 4),  $j$  is the current density at a given overpotential,  $A$  is the geometric surface area of the electrode,  $F$  is the Faraday constant (96485.3 C/mol),  $n$  is the number of active sites (mol). The number of voltammetric charges is gained by CV curves from -0.6 ~ 0 V and 0 ~ 0.6 V vs.

RHE for OER and HER in phosphate buffer solution (pH = 7) with a scan rate of 50 mV/s respectively, and the following equation is  $n \text{ (mol)} = Q/2F$  (the surface charge  $Q$  is proportional to the number of active sites). The long-term stability of the catalyst was conducted by chronopotentiometry (CP). All the data of electrochemistry were presented without any  $iR$  correction.

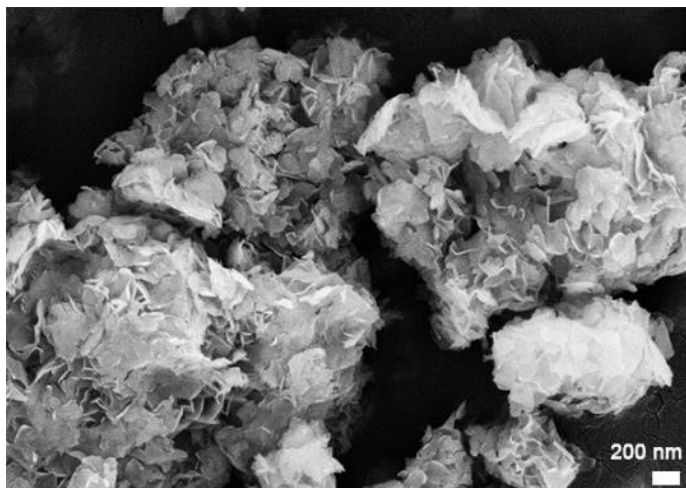

**Fig. S1** SEM image of the NiFe LDH.

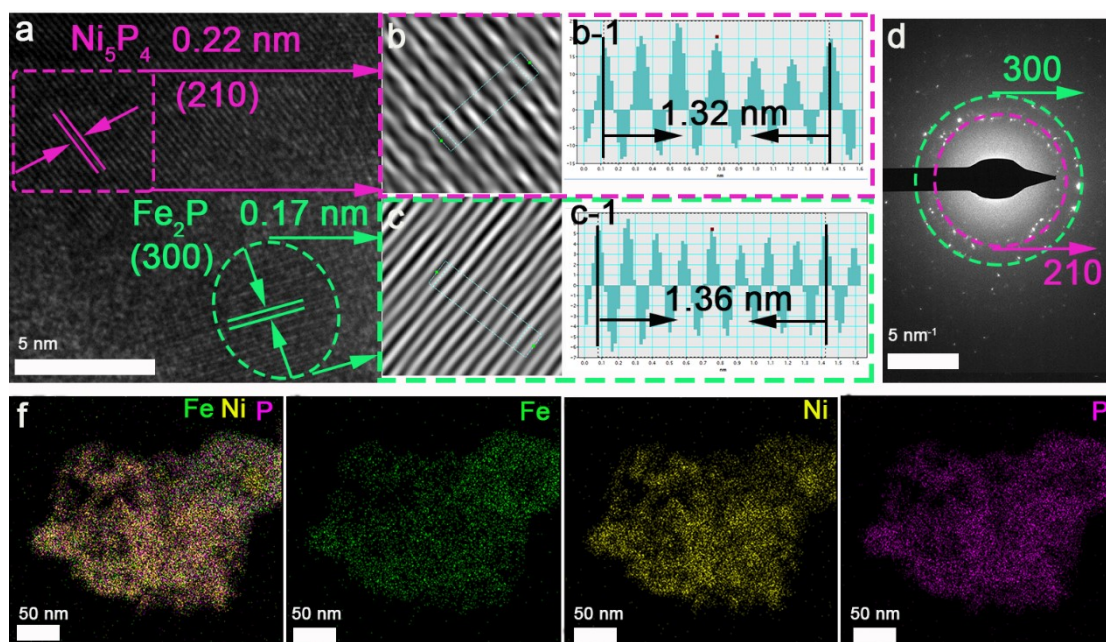

**Fig. S2** (a-c) High-resolution TEM of  $\text{Fe}_2\text{P}/\text{Ni}_5\text{P}_4$ , integrated pixel intensities (b-1 and c-1) of  $\text{Ni}_5\text{P}_4$  and  $\text{Fe}_2\text{P}$  (taken from the green dotted rectangle in (b) and (c)). (d) SAED pattern of  $\text{Fe}_2\text{P}/\text{Ni}_5\text{P}_4$ . (f) Mapping images of  $\text{Fe}_2\text{P}/\text{Ni}_5\text{P}_4$

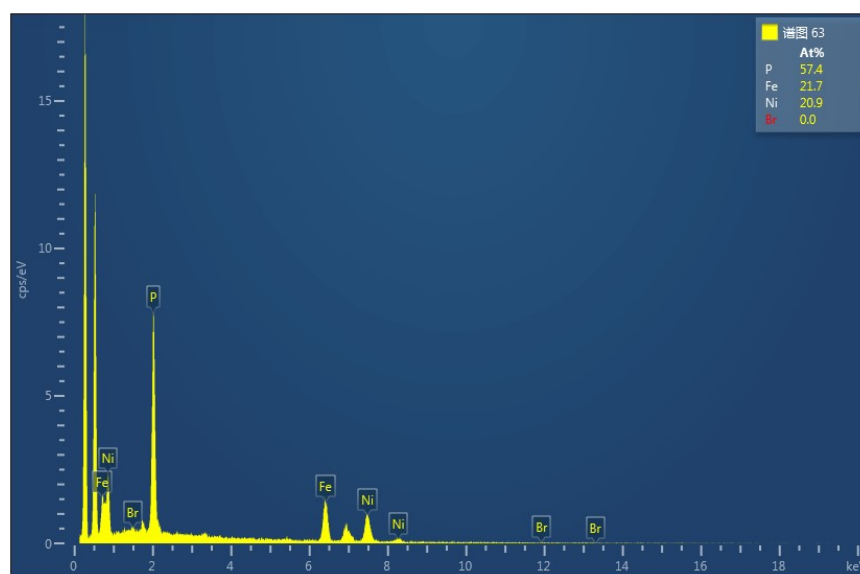

**Fig. S3** EDX spectrum of  $\text{Fe}_2\text{P}/\text{Ni}_2\text{P}$ .

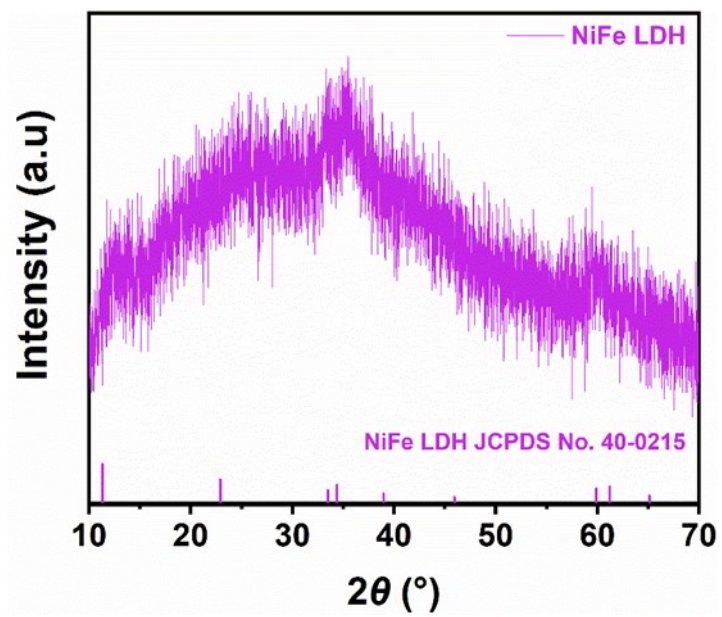

Fig. S4 XRD patterns of NiFe LDH

**Table S1** UPS measured work functions of Fe<sub>2</sub>P, Ni<sub>5</sub>P<sub>4</sub> and Ni<sub>2</sub>P

| <b>Catalysts</b>                   | <b>E<sub>cutoff</sub> (eV)</b> | <b>E<sub>VB</sub> (eV)</b> | <b>Φ (eV)</b> |
|------------------------------------|--------------------------------|----------------------------|---------------|
| <b>Fe<sub>2</sub>P</b>             | 15.0                           | 2.47                       | 6.22          |
| <b>Ni<sub>5</sub>P<sub>4</sub></b> | 15.3                           | 3.96                       | 5.92          |
| <b>Ni<sub>2</sub>P</b>             | 14.5                           | 3.67                       | 6.72          |



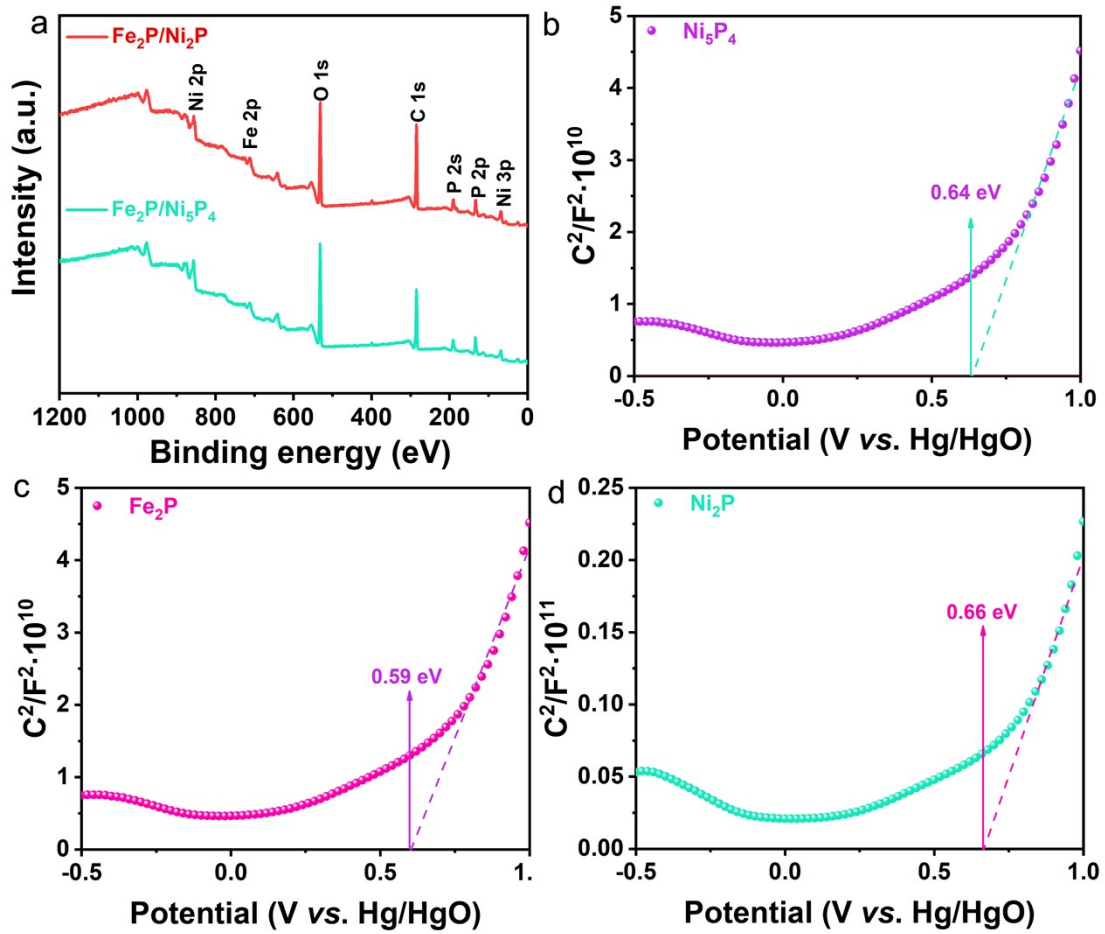

**Fig. S5** (a) XPS survey spectra of the Fe<sub>2</sub>P/Ni<sub>2</sub>P and Fe<sub>2</sub>P/Ni<sub>5</sub>P<sub>4</sub>. Mott-Schottky plots of (b) Ni<sub>5</sub>P<sub>4</sub>, (c) Fe<sub>2</sub>P, and (d) Ni<sub>2</sub>P.

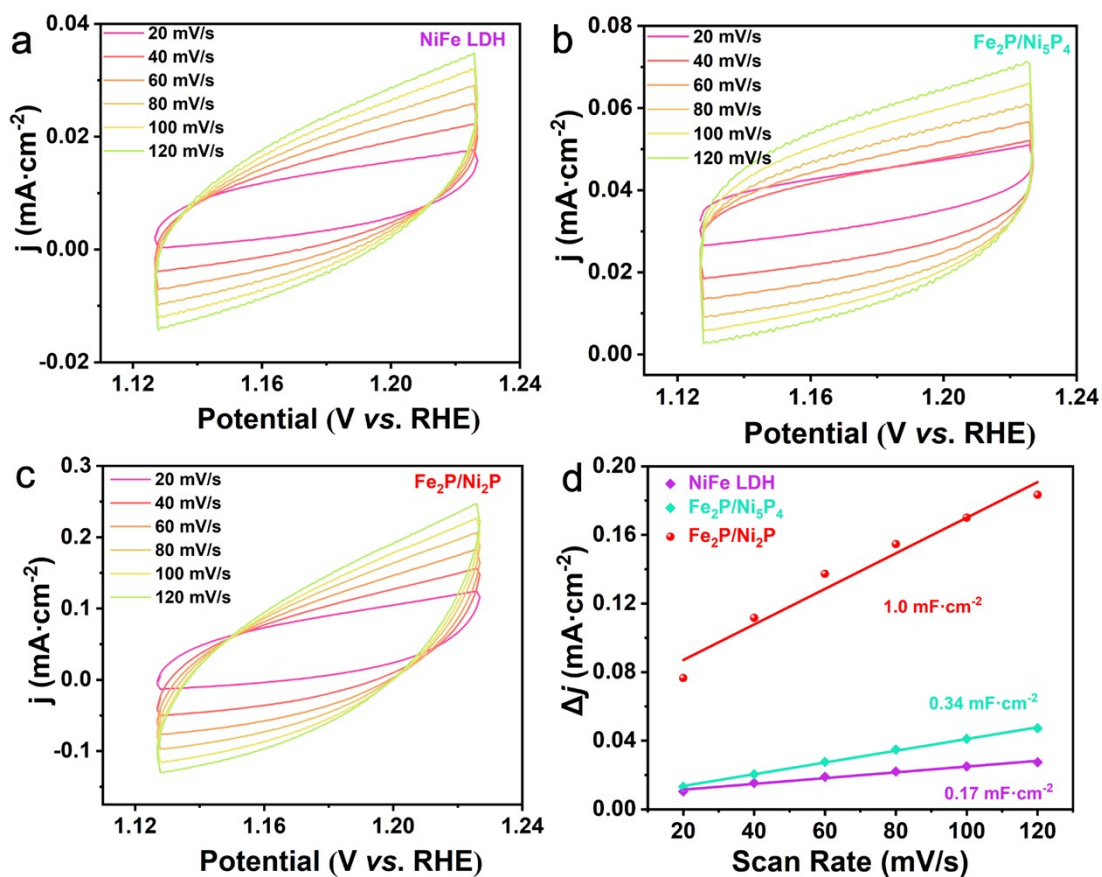

**Fig. S6** (a-c) CV curves of different electrocatalysts with different scanning rates for OER in 1.0 M KOH solution. (d)  $C_{dl}$  values of different catalysts for OER in 1.0 M KOH solution.

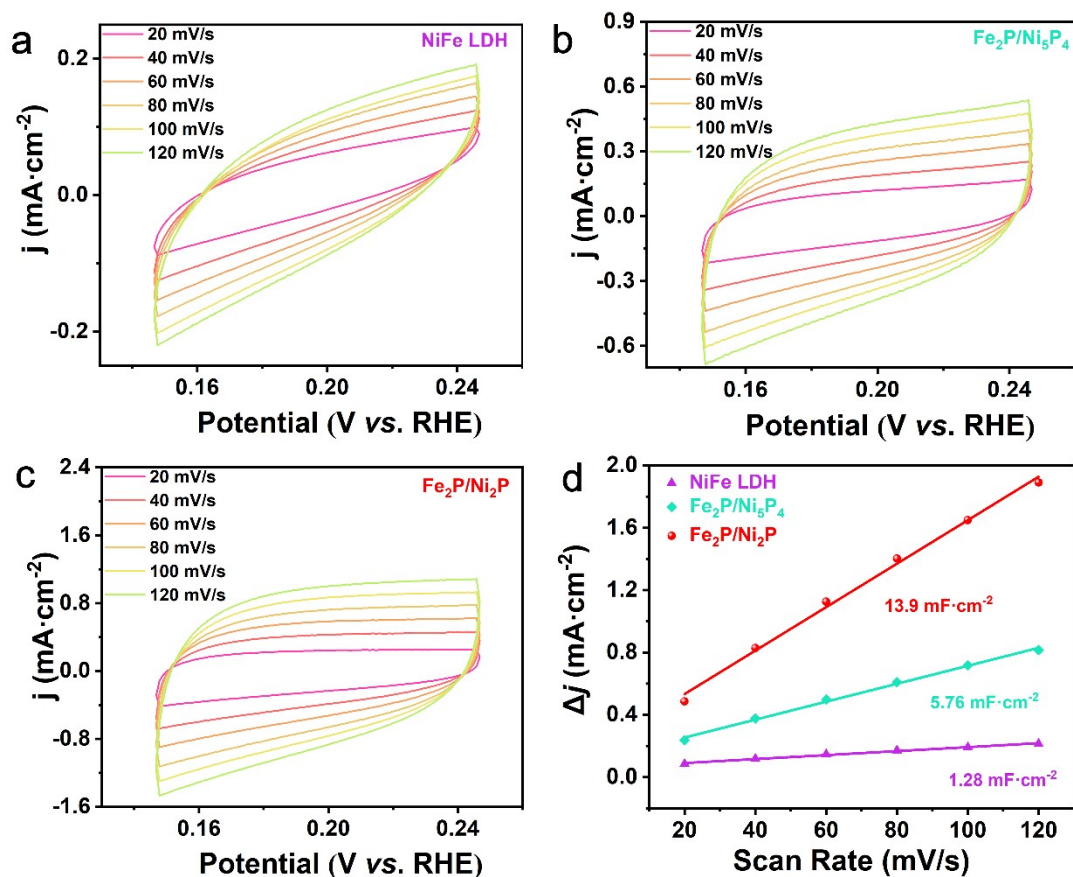

**Fig. S7** (a-c) CV curves of different electrocatalysts with different scanning rates for HER in 1.0 M KOH solution. (d)  $C_{dl}$  values of different catalysts for HER in 1.0 M KOH solution.

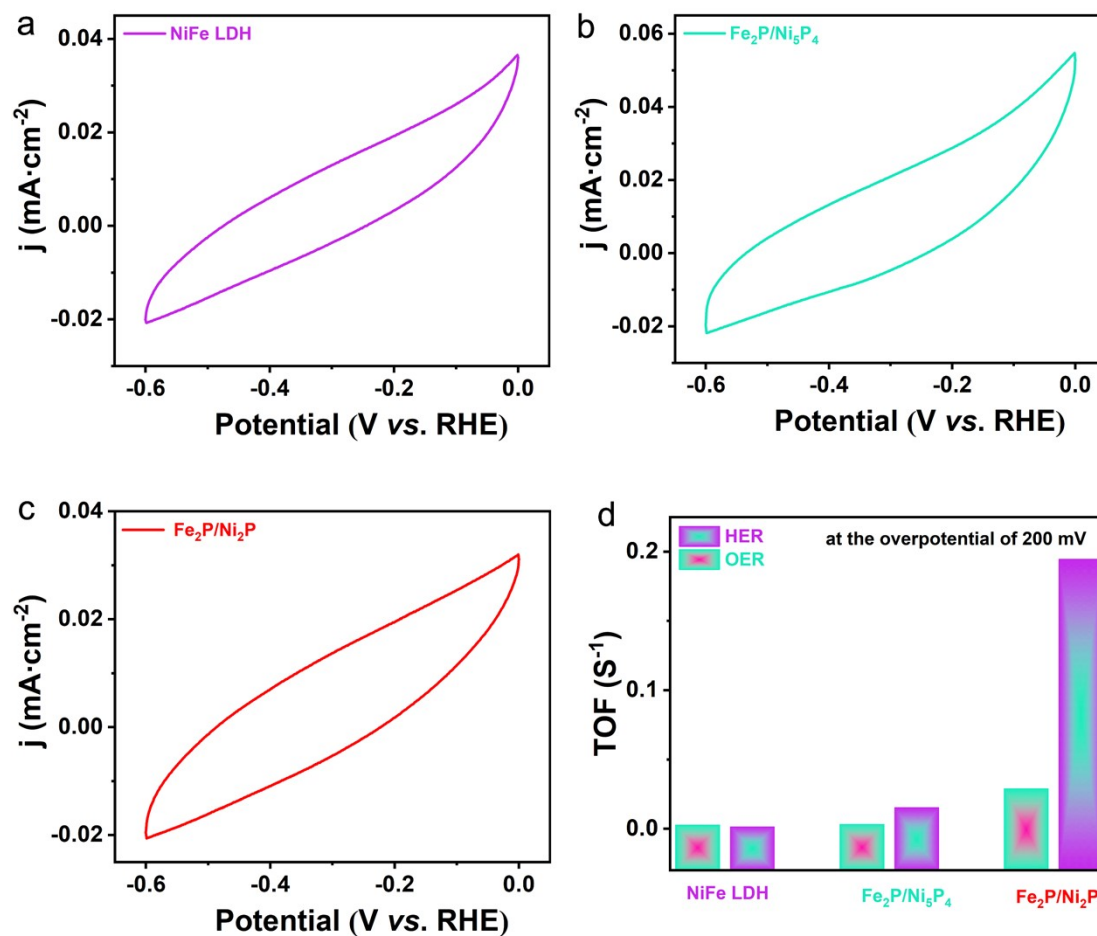

**Fig. S8** (a-c) CV curves from -0.6 to 0 V vs. RHE for OER in 1.0 M PBS (pH = 7) at 50 mV s<sup>-1</sup>. (d) TOF values of different catalysts for OER and HER in 1.0 M KOH + freshwater solution.

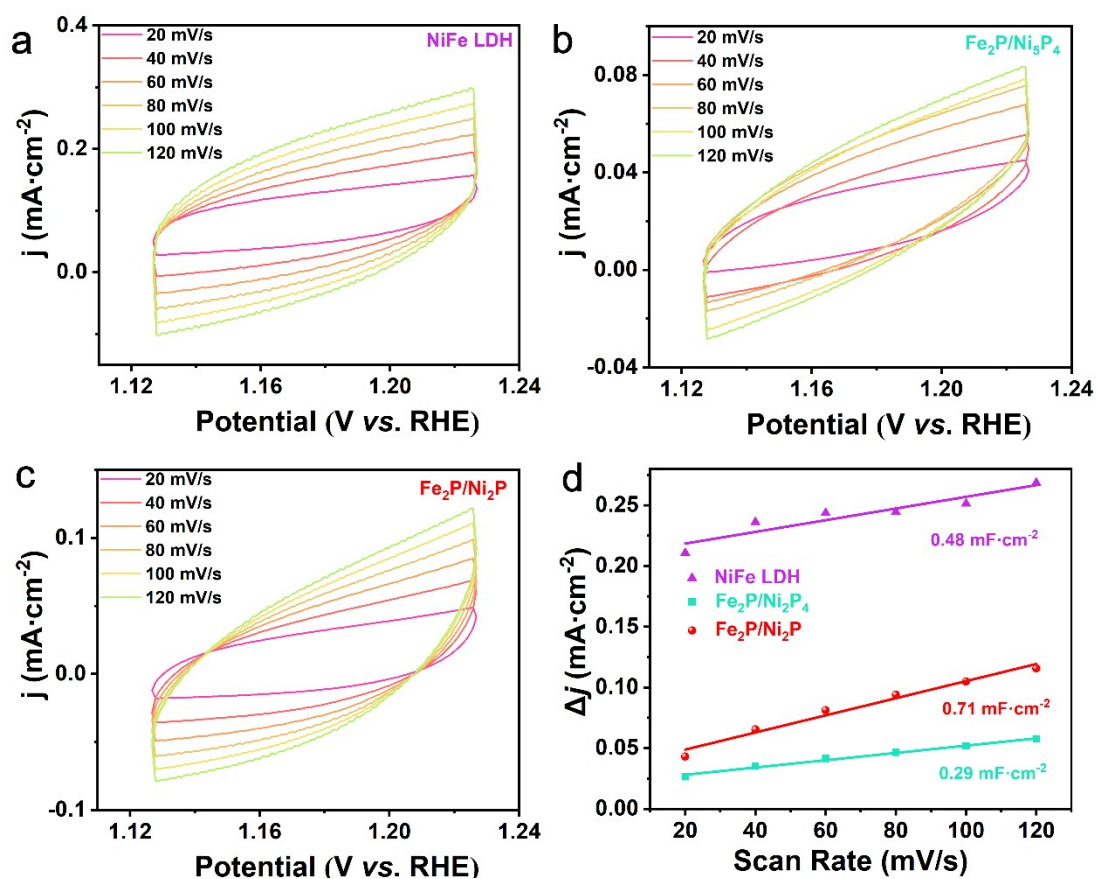

**Fig. S9** (a-c) CV curves of different electrocatalysts with different scanning rates for OER in alkaline seawater solution. (d)  $C_{dl}$  values of different catalysts for OER in alkaline seawater solution.

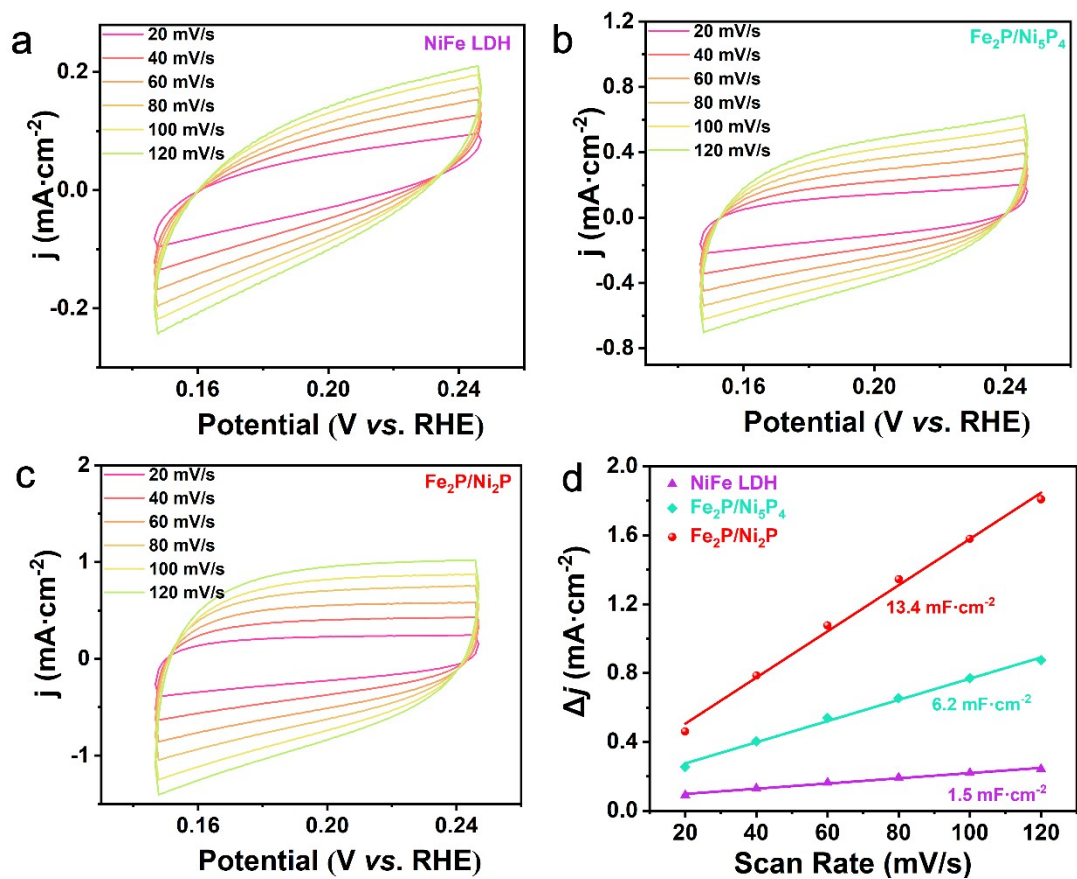

**Fig. S10** (a-c) CV curves of different electrocatalysts with different scanning rates for HER in alkaline seawater solution. (d)  $C_{dl}$  values of different catalysts for HER in alkaline seawater solution.

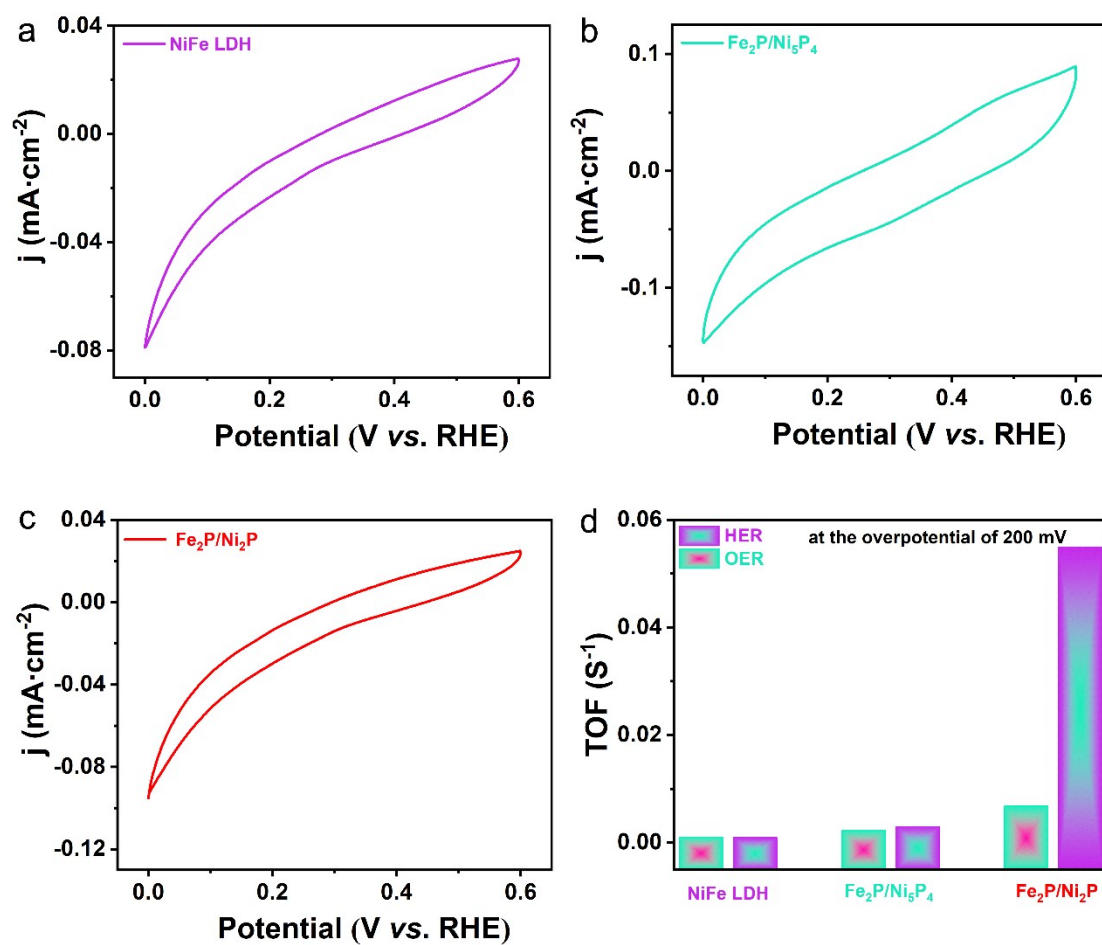

**Fig. S11** (a-c) CV curves from 0 ~ 0.6 V vs. RHE for OER in 1.0 M PBS (pH = 7) at 50 mV s<sup>-1</sup>. (d) TOF values of different catalysts for OER and HER in 1.0 M KOH + seawater solution.

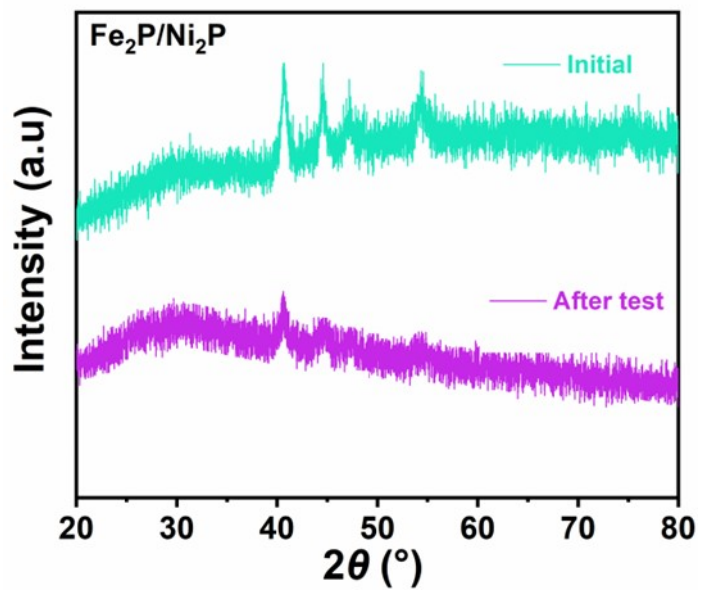

Fig. S12 XRD pattern of the  $\text{Fe}_2\text{P}/\text{Ni}_2\text{P}$  catalyst before and after the test.



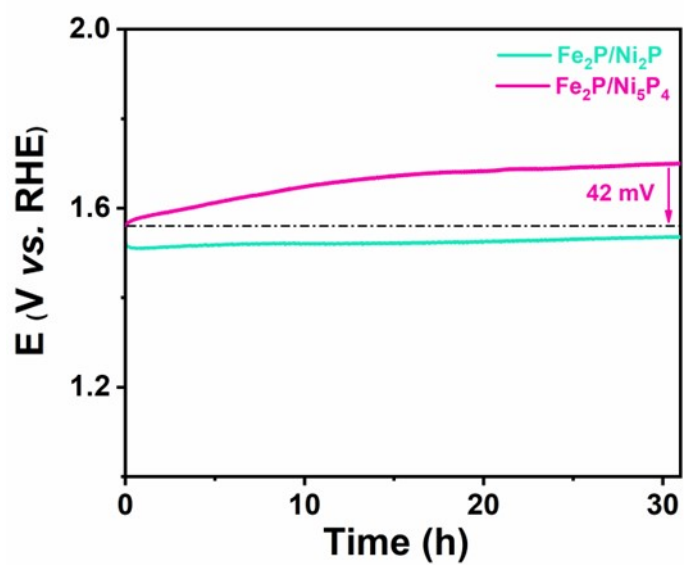

**Fig. S13** Electrolytic alkaline seawater oxidation lifespan comparison of  $\text{Fe}_2\text{P}/\text{Ni}_2\text{P}$  and  $\text{Fe}_2\text{P}/\text{Ni}_5\text{P}_4$  at  $50 \text{ mA cm}^{-2}$ .

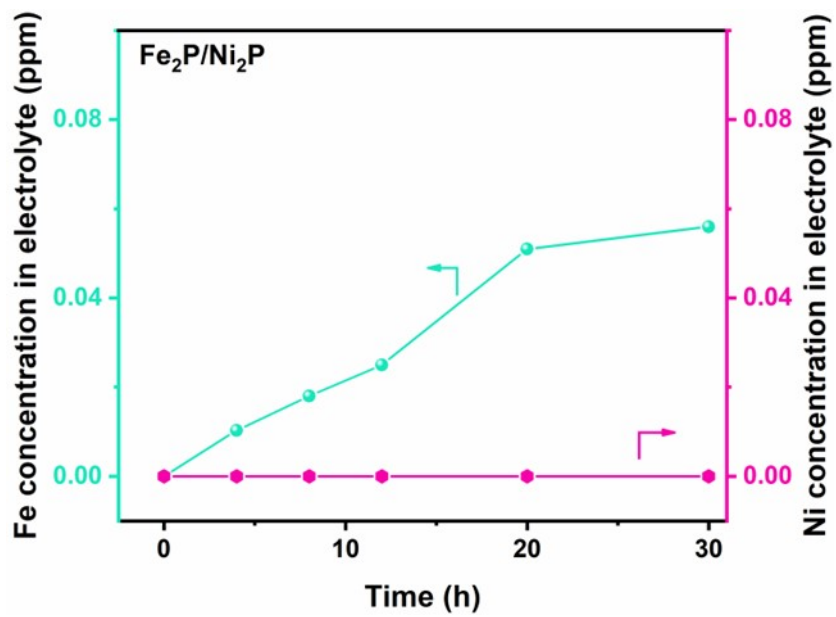

Fig. S14 Concentrations of Fe and Ni versus reaction time for  $\text{Fe}_2\text{P}/\text{Ni}_2\text{P}$ .

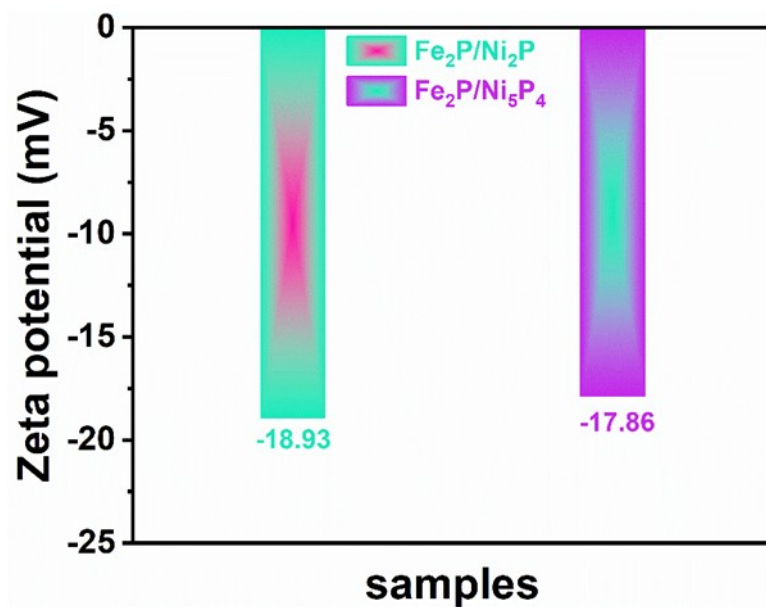

Fig. S15 Zeta potential values of Fe<sub>2</sub>P/Ni<sub>5</sub>P<sub>4</sub> and Fe<sub>2</sub>P/Ni<sub>2</sub>P.

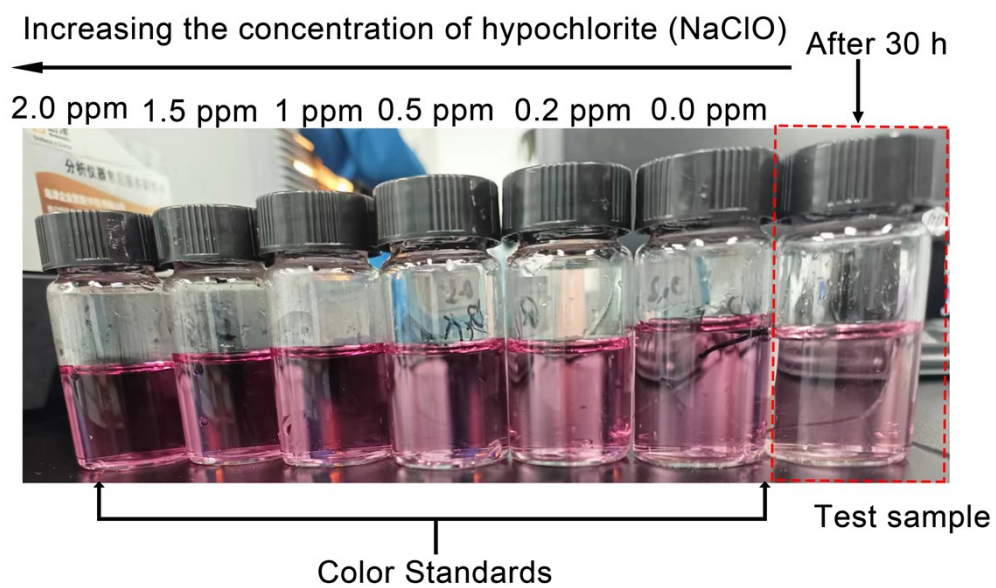

**Fig. S16** Hypochlorite detection result with different NaClO contents and the electrolyte after 30 h electrolysis for Fe<sub>2</sub>P/Ni<sub>2</sub>P at a constant current density of 50 mA cm<sup>-2</sup> in 1 M KOH + seawater.

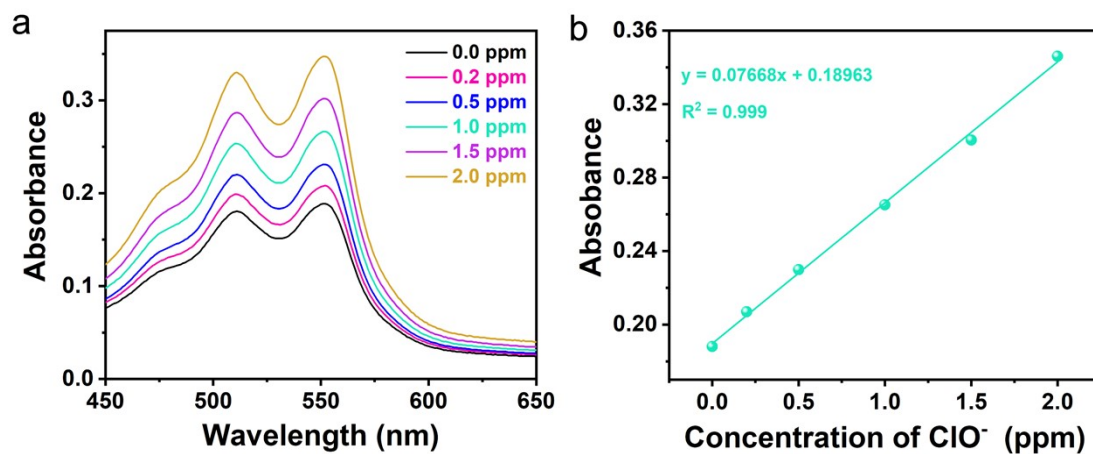

**Fig. S17** (a) UV-Vis absorption spectra of ClO<sup>-</sup> with different concentrations. (b) Calibration curve used for calculating ClO<sup>-</sup> concentrations of the electrolyte.

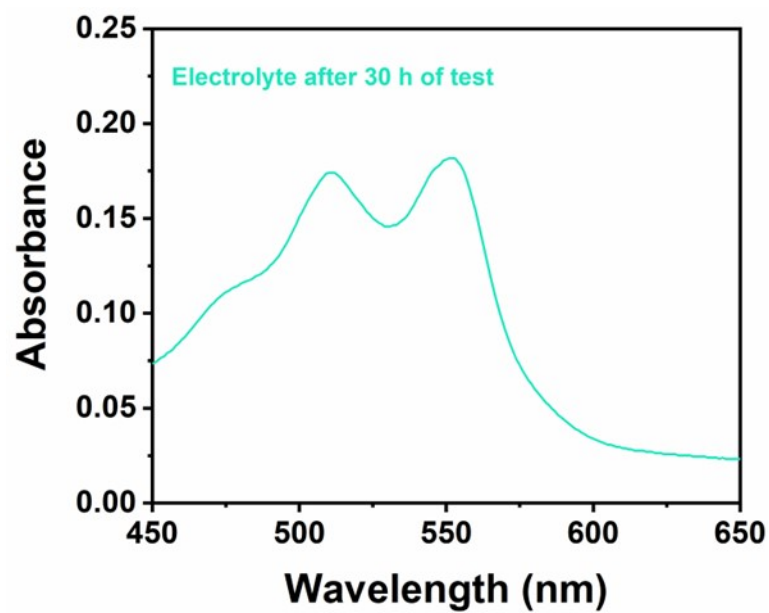

**Fig. S18** UV/Vis absorption spectrum of the electrolyte after 100 h electrolysis for  $\text{Fe}_2\text{P}/\text{Ni}_2\text{P}$  at a constant current density of  $50 \text{ mA cm}^{-2}$  in 1 M KOH + seawater.

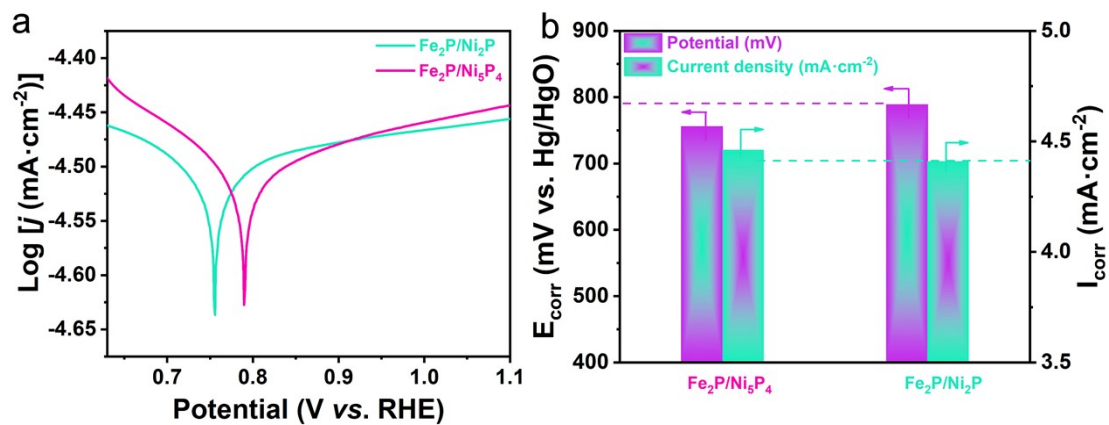

**Fig. S19** (a) Polarization curves for corresponding electrodes after OCP test. (b) comparison of  $E_{\text{corr}}$  and  $I_{\text{corr}}$  on  $\text{Fe}_2\text{P/Ni}_5\text{P}_4$  and  $\text{Fe}_2\text{P/Ni}_2\text{P}$ .

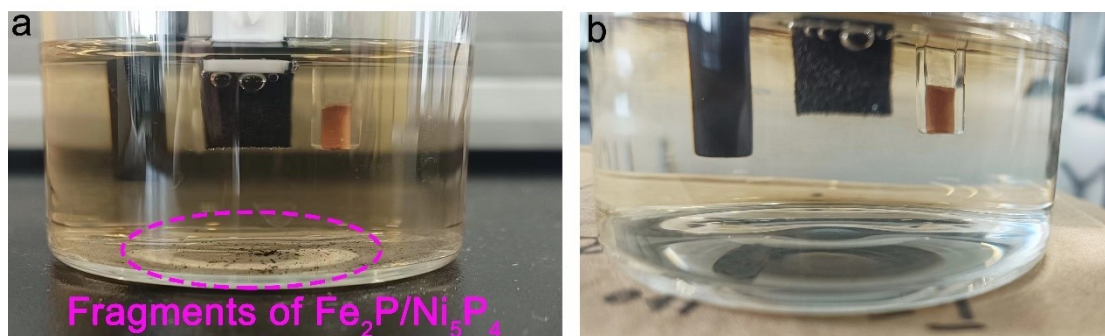

**Fig. S20** Photographs of (a)  $\text{Fe}_2\text{P}/\text{Ni}_5\text{P}_4$  and (b)  $\text{Fe}_2\text{P}/\text{Ni}_2\text{P}$  during alkaline seawater electrolysis. The fragment of  $\text{Fe}_2\text{P}/\text{Ni}_5\text{P}_4$  would severely drop as a result of instability.



**Table S2** Comparison of OER performance in 1.0 M KOH solution for Fe<sub>2</sub>P/Ni<sub>2</sub>P

with some representative catalysts.

| Catalysts                                        | Overpotential<br>(mV) | Current density<br>(mA cm <sup>-2</sup> ) | Ref              |
|--------------------------------------------------|-----------------------|-------------------------------------------|------------------|
| <b>Fe<sub>2</sub>P/Ni<sub>2</sub>P</b>           | 196                   | <b>10</b>                                 | <b>This work</b> |
| CoP <sub>2</sub> /NC-1                           | 290                   | 10                                        | 1                |
| Ir@Zr-CoP                                        | 292                   | 10                                        | 2                |
| Ru-MoCoP                                         | 240                   | 10                                        | 3                |
| Ni <sub>2</sub> P/Ni <sub>5</sub> P <sub>4</sub> | 286                   | 10                                        | 4                |
| CoP@CNF                                          | 300                   | 10                                        | 5                |
| CoP/NiCoP                                        | 310.7                 | 10                                        | 6                |
| CoP/Mo <sub>2</sub> CT <sub>x</sub>              | 312                   | 10                                        | 7                |
| Ru-RuP <sub>x</sub> Co <sub>x</sub> P            | 338                   | 10                                        | 8                |
| Fe-Co-P                                          | 340                   | 10                                        | 9                |
| Mn-CoP-2                                         | 344                   | 10                                        | 10               |
| V-CoP                                            | 420                   | 10                                        | 11               |

**Table S3** Comparison of HER performance in 1.0 M KOH solution for Fe<sub>2</sub>P/Ni<sub>2</sub>P with some representative catalysts reported.

| Catalysts                                   | Overpotential<br>(mV) | Current density<br>(mA cm <sup>-2</sup> ) | Tafel slope<br>(mV/dec) | Ref.             |
|---------------------------------------------|-----------------------|-------------------------------------------|-------------------------|------------------|
| <b>Fe<sub>2</sub>P/Ni<sub>2</sub>P</b>      | <b>108</b>            | <b>10</b>                                 | <b>121.5</b>            | <b>This work</b> |
| Co-P-O <sub>2</sub>                         | 113                   | 10                                        | 49                      | 12               |
| Co-Ni-P/MoS <sub>2</sub>                    | 116                   | 10                                        | 41                      | 13               |
| V-dope-MoS <sub>2</sub>                     | 206                   | 10                                        | 89                      | 14               |
| NiCoSe S/BP                                 | 172                   | 10                                        | 128                     | 15               |
| NiSe@Co <sub>0.85</sub> Se/N<br>F           | 168                   | 10                                        | 72                      | 16               |
| Co <sub>0.85</sub> Se/Ni <sub>0.85</sub> Se | 250                   | 10                                        | 93                      | 17               |
| NiFeP/NCH                                   | 216                   | 10                                        | —                       | 18               |
| FeCo/Co <sub>2</sub> P@NPC<br>F             | 260                   | 10                                        | 120                     | 19               |
| SWCNTs/ReS <sub>2</sub>                     | 327                   | 10                                        | —                       | 20               |
| Co <sup>II</sup> Fe-ONC                     | 284                   | 10                                        | 75.8                    | 21               |
| Pd-e-NiCo-PBA-C                             | 147                   | 10                                        | 67                      | 22               |
| Fe-Co-Ni-P-1                                | 215                   | 10                                        | 72.1                    | 23               |

**Table S4** Fitting parameters of Fe<sub>2</sub>P/Ni<sub>2</sub>P electrode for impedance spectra in **Fig. 6a**.

| <b>Potential (V)</b> | <b>R<sub>1</sub> (Ω)</b> | <b>R<sub>2</sub> (Ω)</b> |
|----------------------|--------------------------|--------------------------|
| 1.20                 | 4845                     | 1336                     |
| 1.25                 | 4676                     | 1267                     |
| 1.30                 | 4426                     | 1205                     |
| 1.35                 | 4230                     | 937                      |
| 1.40                 | 2612                     | 239.3                    |
| 1.45                 | 1235                     | 15.6                     |
| 1.50                 | 162.8                    | 7.4                      |
| 1.55                 | 28                       | 6.2                      |
| 1.60                 | 15                       | 5.1                      |

**Table S5** Fitting parameters of Fe<sub>2</sub>P/Ni<sub>5</sub>P<sub>4</sub> electrode for impedance spectra in **Fig. 6d**.

| Potential (V) | R <sub>1</sub> (Ω) | R <sub>2</sub> (Ω) |
|---------------|--------------------|--------------------|
| 1.20          | 11569              | 2774               |
| 1.25          | 10385              | 2673               |
| 1.30          | 10194              | 2543               |
| 1.35          | 9945               | 2204               |
| 1.40          | 6769               | 975                |
| 1.45          | 2684               | 674                |
| 1.50          | 300                | 101                |
| 1.55          | 63                 | 31                 |
| 1.60          | 19                 | 5.6                |

**Table S6** Comparison of OER performance in alkaline seawater solution for Fe<sub>2</sub>P/Ni<sub>2</sub>P with some representative catalysts reported.

| Catalysts                              | Overpotential<br>(mV) | Current density<br>(mA cm <sup>-2</sup> ) | Tafel slope<br>(mV/dec) | Ref.             |
|----------------------------------------|-----------------------|-------------------------------------------|-------------------------|------------------|
| <b>Fe<sub>2</sub>P/Ni<sub>2</sub>P</b> | <b>229</b>            | <b>10</b>                                 | <b>89.3</b>             | <b>This work</b> |
| Fe <sub>2</sub> P-NiCoP                | 258                   | 10                                        | 49                      | 24               |
| FCNP@CQs                               | 268                   | 10                                        | 45.2                    | 25               |
| CoSe <sub>2</sub> -NCF                 | 245                   | 10                                        | 93                      | 26               |
| Er-MoO <sub>2</sub>                    | 312                   | 10                                        | 99                      | 27               |
| ER-SNCF-20s                            | 278                   | 10                                        | 57                      | 28               |
| Fe <sub>2</sub> P-NiCoP                | 245                   | 10                                        | 82.5                    | 29               |
| NiMoSe@CC                              | 360                   | 10                                        | —                       | 30               |
| Co <sub>2</sub> P/CoMoP <sub>2</sub>   | 268                   | 10                                        | 81                      | 31               |

**Table S7** The alkaline OWS performance of Fe<sub>2</sub>P/Ni<sub>2</sub>P with some representative bifunctional electrocatalysts reported.

| Catalysts                                                          | Electrolyte | Cell voltage (V) | Ref              |
|--------------------------------------------------------------------|-------------|------------------|------------------|
| <b>Fe<sub>2</sub>P/Ni<sub>2</sub>P</b>                             | 1.0 KOH     | <b>1.63</b>      | <b>This work</b> |
| S,N-CNTs<br>/CoS <sub>2</sub> @Co                                  | 1.0 KOH     | 1.633            | 32               |
| CoNSC                                                              | 1.0 KOH     | 1.64             | 33               |
| CoP/NCNHP                                                          | 1.0 KOH     | 1.64             | 34               |
| Co/β-Mo <sub>2</sub> C@N-CNTs                                      | 1.0 KOH     | 1.64             | 35               |
| CoP@SNC                                                            | 1.0 KOH     | 1.64             | 36               |
| v- NiS <sub>2</sub> /CeO <sub>2</sub>                              | 1.0 KOH     | 1.64             | 37               |
| Ni/Mo <sub>2</sub> C-NCNF                                          | 1.0 KOH     | 1.64             | 38               |
| Co <sub>9</sub> S <sub>8</sub> /WS <sub>2</sub> /Ti foil           | 1.0 KOH     | 1.65             | 39               |
| CoP                                                                | 1.0 KOH     | 1.65             | 40               |
| NiCo <sub>2</sub> O <sub>4</sub>                                   | 1.0 KOH     | 1.65             | 41               |
| ONPPGC/OCC                                                         | 1.0 KOH     | 1.66             | 42               |
| EG/Co <sub>0.85</sub> Se/NiFe LDH                                  | 1.0 KOH     | 1.67             | 43               |
| Co-NC/C                                                            | 1.0 KOH     | 1.67             | 44               |
| Sv-Co <sub>3</sub> S <sub>4</sub> /MoS <sub>2</sub>                | 1.0 KOH     | 1.67             | 45               |
| FeCo/Co <sub>2</sub> P@C                                           | 1.0 KOH     | 1.68             | 19               |
| NiFe LDH/NF                                                        | 1.0 KOH     | 1.7              | 46               |
| Ni <sub>5</sub> Ni <sub>4</sub> /NF                                | 1.0 KOH     | 1.7              | 47               |
| Co <sub>9</sub> S <sub>8</sub> /Ni <sub>3</sub> S <sub>2</sub> /NF | 1.0 KOH     | 1.743            | 48               |
| Ni <sub>3</sub> S <sub>2</sub>                                     | 1.0 KOH     | 1.76             | 49               |
| Ni(OH) <sub>2</sub> /CC//NiSe <sub>2</sub> /CC                     | 1.0 KOH     | 1.78             | 50               |

## References

1. Y. Chen, Z. Yang, J. Wang, Y. Yang, X. He, Y. Wang, J. Chen, Y. Guo, X. Wang, S. Wang, *Nano Res.* 2023, **1**.
2. Q. P. Ngo, T. T. Nguyen, Q. T. T. Le, J. H. Lee, N. H. Kim, *Adv. Energy Mater.* 2023, **13**, 2301841.
3. M. Bi, Y. Zhang, X. Jiang, J. Sun, X. Wang, J. Zhu, Y. Fu, *Adv. Energy Mater.* 2024, **34**, 2309330.
4. C. Lyu, C. Cao, J. Cheng, Y. Yang, K. Wu, J. Wu, W.-M. Lau, P. Qian, N. Wang, J. Zheng, *Chem. Eng. J.* 2023, **464**, 142538.
5. A. Ren, B. Yu, M. Huang, Z. Liu, *I Int. J. Hydrogen Energy.* 2024, **51**, 490.
6. X. Fu, Z. Zhang, Y. Zheng, J. Lu, S. Cheng, J. Su, H. Wei, Y. Gao, *J. Colloid Interf. Sci.* 2024, **653**, 1272.
7. S. Liu, Z. Lin, R. Wan, Y. Liu, Z. Liu, S. Zhang, X. Zhang, Z. Tang, X. Lu, Y. Tian, *J. Mater. Chem. A.* 2021, **9**, 21259.
8. L. Wang, Q. Zhou, Z. Pu, Q. Zhang, X. Mu, H. Jing, S. Liu, C. Chen, S. Mu, *Nano Energy.* 2018, **53**, 270.
9. K. Liu, C. Zhang, Y. Sun, G. Zhang, X. Shen, F. Zou, H. Zhang, Z. Wu, E. C. Wegener, C. J. Taubert, *ACS Nano*, **2018**, **12**, 158.
10. Y. Liu, N. Ran, R. Ge, J. Liu, W. Li, Y. Chen, L. Feng, R. Che, *Chem. Eng. J.* 2021, **425**, 131642.
11. R. Zhang, Z. Wei, G. Ye, G. Chen, J. Miao, X. Zhou, X. Zhu, X. Cao, X. Sun, *Adv. Energy Mater.* 2021, **11**, 2101758.
12. J.-B. Chen, J. Ying, Y.-X. Xiao, G. Tian, Y. Dong, L. Shen, S. I. Córdoba de Torresi, M. D. Symes, C. Janiak, X.-Y. Yang, *ACS Catal.* 2023, **13**, 14802.
13. J. Bao, Y. Zhou, Y. Zhang, X. Sheng, Y. Wang, S. Liang, C. Guo, W. Yang, T. Zhuang, Y. Hu, *J. Mater. Chem. A.* 2020, **8**, 22181.
14. S. Bolar, S. Shit, J. S. Kumar, N. C. Murmu, R. S. Ganesh, H. Inokawa, T. Kuila, *Appl. Catal. B: Environ. Energy*, 2019, **254**, 432.
15. T. Liang, S. Lenus, Y. Liu, Y. Chen, T. Sakthivel, F. Chen, F. Ma, Z. Dai, *Energy Environ. Mater.* **2023**, **6**, e12332.

16. W.-L. Ding, Y.-H. Cao, H. Liu, A.-X. Wang, C.-J. Zhang, X.-R. Zheng, *Rare Metals*. 2021, **40**, 1373.
17. K. Ao, J. Dong, C. Fan, D. Wang, Y. Cai, D. Li, F. Huang, Q. Wei, *ACS sustainable Chem. Eng.* 2018, **6**, 10952.
18. Y.-S. Wei, M. Zhang, M. Kitta, Z. Liu, S. Horike, Q. Xu, *J. Am. Chem. Soc.* 2019, **141**, 7906.
19. Q. Shi, Q. Liu, Y. Ma, Z. Fang, Z. Liang, G. Shao, B. Tang, W. Yang, L. Qin, X. Fang, *Adv. Energy Mater.* 2020, **10**, 1903854.
20. B. Martín-García, D. Spirito, S. Bellani, M. Prato, V. Romano, A. Polovitsyn, R. Brescia, R. Oropesa-Nuñez, L. Najafi, A. Ansaldo, *Small*. 2019, **15**, 1904670.
21. P. Guo, Z. Wang, T. Zhang, C. Chen, Y. Chen, H. Liu, M. Hua, S. Wei, X. Lu, *Appl. Catal. B: Environ. Energy*, 2019, **258**, 117968.
22. H. Zhang, Q. Jiang, J. H. Hadden, F. Xie, D. J. Riley, *Adv. Energy Mater.* 2021, **31**, 2008989.
23. X. Zhou, Y. Zi, L. Xu, T. Li, J. Yang, J. Tang, *Inorg. Chem.* 2021, **60**, 11661.
24. M. Xiao, C. Zhang, P. Wang, W. Zeng, J. Zhu, Y. Li, W. Peng, Q. Liu, H. Xu, Y. Zhao, *Mater. Today Phys.* 2022, **24**, 100684.
25. S. Lv, Y. Deng, Q. Liu, Z. Fu, X. Liu, M. Wang, Z. Xiao, B. Li, L. Wang, *Appl. Catal. B: Environ. Energy*. 2023, **326**, 122403.
26. H. Chen, S. Zhang, Q. Liu, P. Yu, J. Luo, G. Hu, X. Liu, *Inorg. Chem. Commun.* 2022, **146**, 110170.
27. T. Yang, H. Lv, Q. Quan, X. Li, H. Lu, X. Cui, G. Liu, L. Jiang, *Appl. Surf. Sci.* 2023, **615**, 156360.
28. R. Hu, M. Zhao, H. Miao, F. Liu, J. Zou, C. Zhang, Q. Wang, Z. Tian, Q. Zhang, J. Yuan, *Nanoscale*. 2022, **14**, 10118.
29. L. Jin, H. Xu, K. Wang, L. Yang, Y. Liu, X. Qian, G. He, H. Chen, *Appl. Surf. Sci.* 2024, 159777.
30. M. Saquib, P. Arora, A. C. Bhosale, *Fuel*. 2024, **365**, 131251.
31. B. Sun, C. Li, J. Yang, H. Bai, X. Meng, *Inorg. Chem. Front.* 2024.
32. J.-Y. Wang, T. Ouyang, N. Li, T. Ma, Z.-Q. Liu, *Sci. Bull.* 2018, **63**, 1130.



33. Z. Zhang, X. Zhao, S. Xi, L. Zhang, Z. Chen, Z. Zeng, M. Huang, H. Yang, B. Liu, S. J. Pennycook, *Adv. Energy Mater.* 2020, **10**, 2002896.
34. Y. Pan, K. Sun, S. Liu, X. Cao, K. Wu, W.-C. Cheong, Z. Chen, Y. Wang, Y. Li, Y. Liu, *J. Am. Chem. Soc.* 2018, **140**, 2610.
35. T. Ouyang, Y. Q. Ye, C. Y. Wu, K. Xiao, Z. Q. Liu, *Angew. Chem. Int. Ed.* 2019, **58**, 4923.
36. T. Meng, Y.-N. Hao, L. Zheng, M. Cao, *Nanoscale* 2018, **10**, 14613.
37. W. Liao, W. Li, Y. Zhang, *Mater. Today Chem.* 2022, **24**, 100791.
38. M. Li, Y. Zhu, H. Wang, C. Wang, N. Pinna, X. Lu, *Adv. Energy Mater.* 2019, **9**, 1803185.
39. S. Peng, L. Li, J. Zhang, T. L. Tan, T. Zhang, D. Ji, X. Han, F. Cheng, S. Ramakrishna, *J. Mater. Chem. A.* 2017, **5**, 23361.
40. L. Ji, J. Wang, X. Teng, T. J. Meyer, Z. Chen, *ACS Catal.* 2019, **10**, 412.
41. X. Gao, H. Zhang, Q. Li, X. Yu, Z. Hong, X. Zhang, C. Liang, Z. Lin, *Angew. Chem. Int. Ed.* 2016, **55**, 6290.
42. J. Lai, S. Li, F. Wu, M. Saqib, R. Luque, G. Xu, *Energy Environ. Sci.* 2016, **9**, 1210.
43. Y. Hou, M. R. Lohe, J. Zhang, S. Liu, X. Zhuang, X. Feng, *Energy Environ. Sci.* 2016, **9**, 478.
44. H. Huang, S. Zhou, C. Yu, H. Huang, J. Zhao, L. Dai, J. Qiu, *Energy Environ. Sci.* 2020, **13**, 545.
45. Q. He, N. Ye, L. Han, K. Tao, *Inorg. Chem.* 2023, **62**, 21240.
46. J. Luo, J.-H. Im, M. T. Mayer, M. Schreier, M. K. Nazeeruddin, N.-G. Park, S. D. Tilley, H. J. Fan, M. Grätzel, *Sci.* 2014, **345**, 1593.
47. M. Ledendecker, S. Krick Calderón, C. Papp, H. P. Steinrück, M. Antonietti, M. Shalom, *Angew. Chem. Int. Ed.* 2015, **54**, 12361.
48. Y. Yang, H. Yao, Z. Yu, S. M. Islam, H. He, M. Yuan, Y. Yue, K. Xu, W. Hao, G. Sun, *J. Am. Chem. Soc.* 2019, **141**, 10417.
49. L.-L. Feng, G. Yu, Y. Wu, G.-D. Li, H. Li, Y. Sun, T. Asefa, W. Chen, X. Zou, *J. Am. Chem. Soc.* 2015, **137**, 14023.

50. H. Liang, L. Li, F. Meng, L. Dang, J. Zhuo, A. Forticaux, Z. Wang, S. Jin, *Chem. Mater.* 2015, **27**, 5702.
